# Supplementary material for: Polymeric ionic liquid–ionic plastic crystal all-solid-state electrolytes for wide operating temperature range lithium metal batteries
Source: Royal Society of Chemistry journal article supplement (doi:10.1039/c7ta04204c), 2017-01-01
Supplement: c7ta04204c1.pdf [file c7ta04204c1.pdf]

## Supporting Information

### **Polymeric ionic liquid-ionic plastic crystal all-solid-state electrolytes for wide operating temperature range lithium metal batteries**

Xiaowei Li,<sup>a</sup> Zhengxi Zhang,<sup>\*a,b</sup> Sijian Li,<sup>a</sup> Kaihua Yang,<sup>a</sup> Li Yang<sup>\*a,b</sup>

a. School of Chemistry and Chemical Engineering, Shanghai Jiao Tong University,

Shanghai 200240, PR China

b. Shanghai Electrochemical Energy Devices Research Center,

Shanghai 200240, PR China

\*Corresponding Author:

Email: zhengxizhang@sjtu.edu.cn(Z. X. Zhang); liyangce@sjtu.edu.cn(L. Yang).

Tel.: +86 21 54748917. Fax: +86 21 54741297.

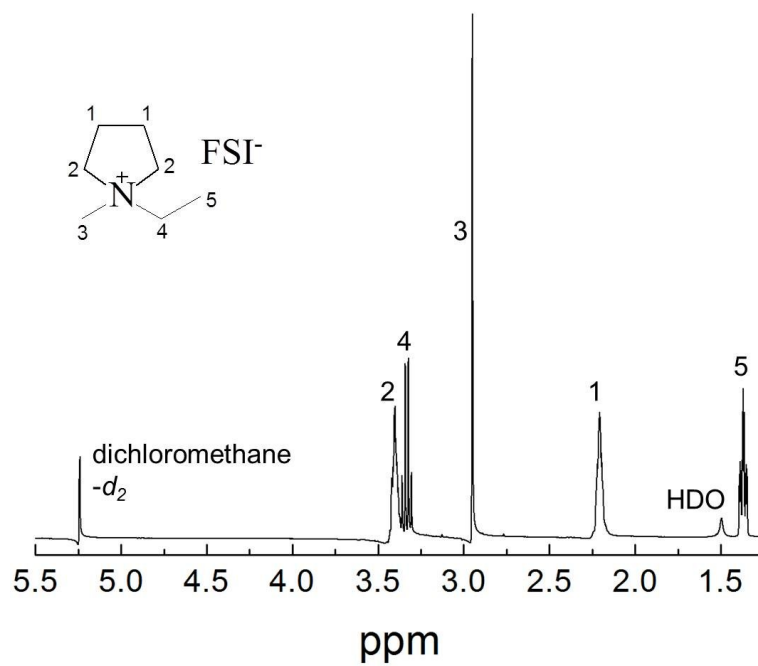

**Fig. S1.** <sup>1</sup>H NMR spectrum of P<sub>12</sub>FSI.

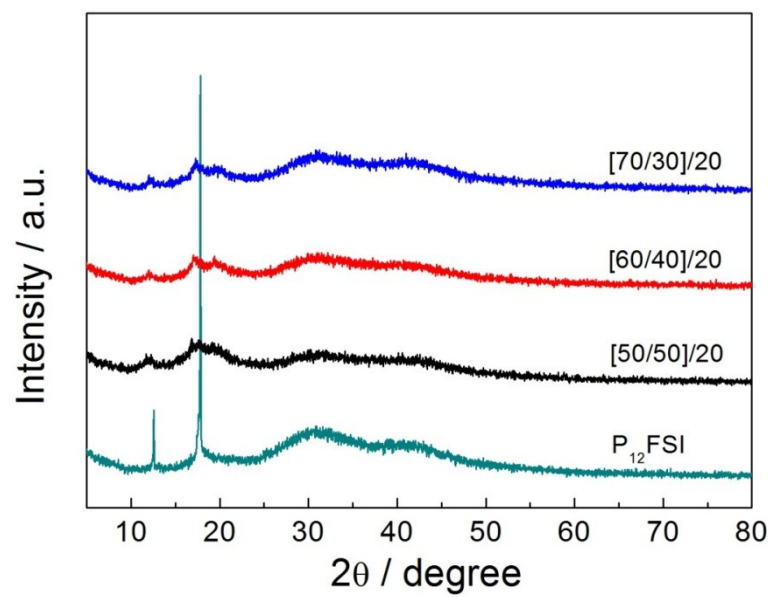

**Fig. S2.** XRD patterns of P<sub>12</sub>FSI and PIL-P<sub>12</sub>FSI SPE samples with different weight ratio of PIL/P<sub>12</sub>FSI.

It can be seen that P<sub>12</sub>FSI shows two characteristic peaks at about 13° and 18°. When P<sub>12</sub>FSI is introduced in the SPEs, its characteristic peaks disappear, and the SPE samples are amorphous.

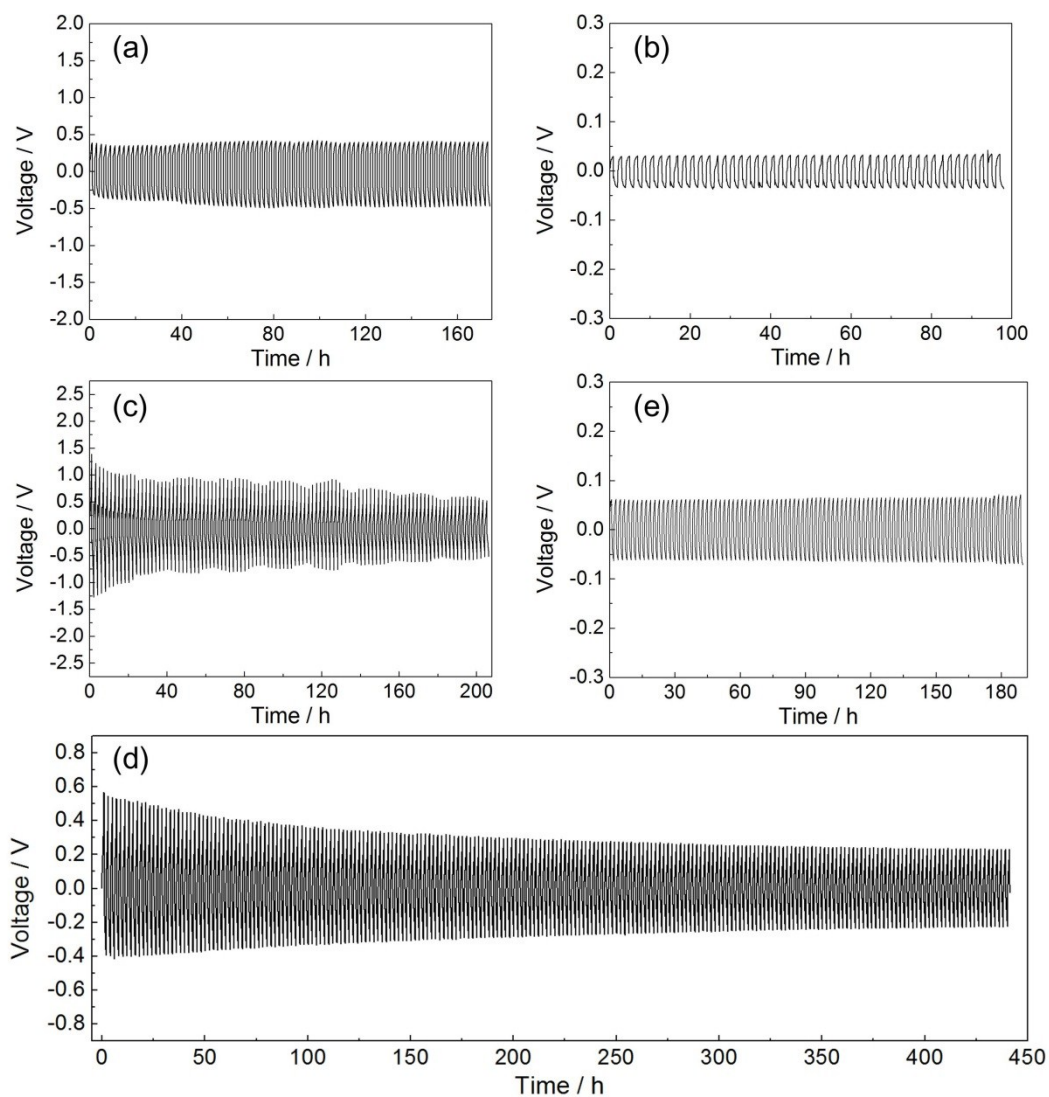

**Fig. S3.** Time-dependent voltage profiles for symmetrical Li/[50/50]/20 SPE/Li cells under the current density of 0.1 mA cm<sup>-2</sup> at (a) 25 °C and (b) 80 °C; and profiles under the current density of 0.2 mA cm<sup>-2</sup> at (c) 25 °C, (d) 40 °C and (e) 80 °C.
